# Supplementary material
Source: Springer Nature journal article supplement (https://www.springermedizin.de/resource/supplementary/13014_2008_131_MOESM7_ESM.pdf/9632972)

DMPO-50

2S-DMPO-50

$C_{2b}$

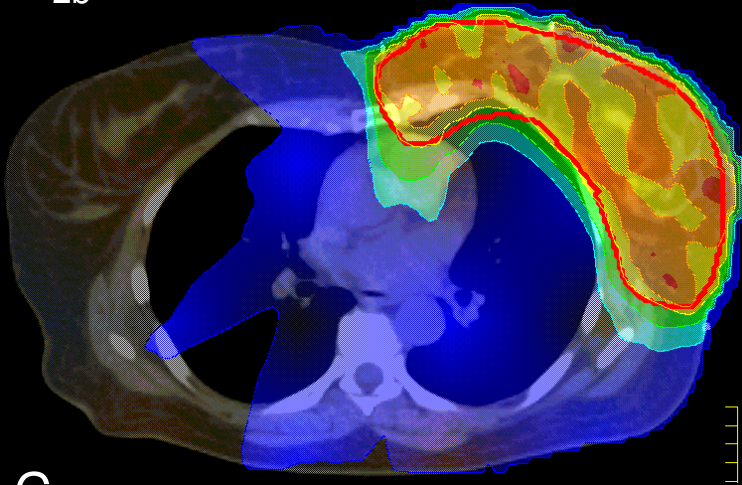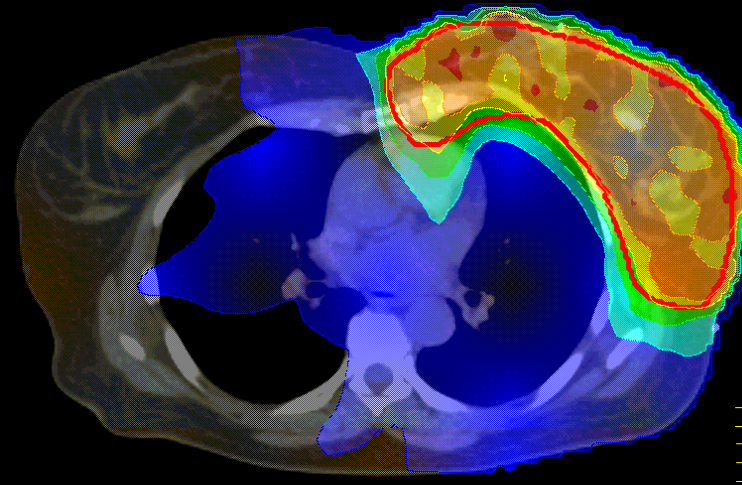

$C_{2c}$

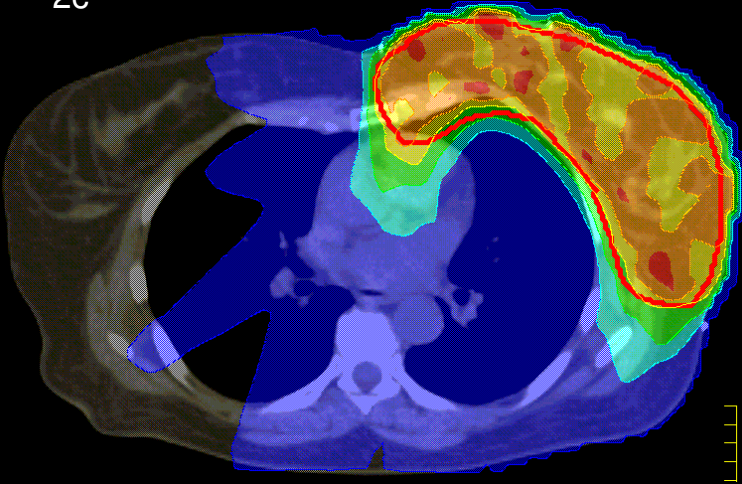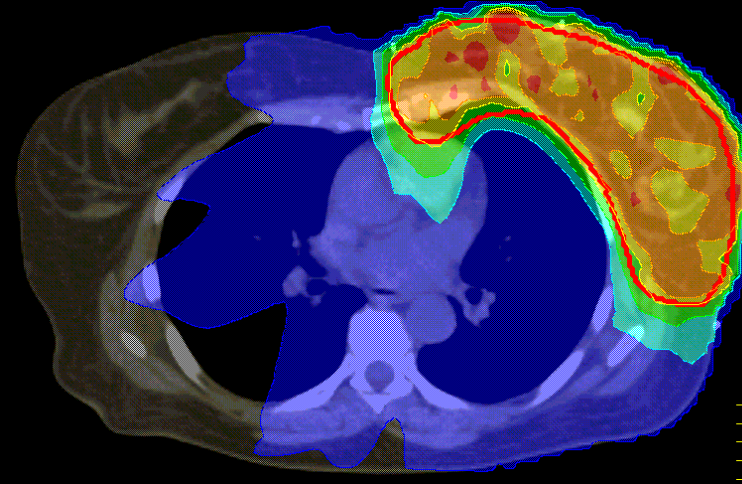

Supplement: MOESM7 [file 9632972]
